# Supplementary material for: Sensing and photocatalytic properties of a new 3D Co(ii) coordination polymer based on 1,1′-di(p-carboxybenzyl)-2,2′-biimidazole
Source: Royal Society of Chemistry journal article supplement (doi:10.1039/d2nj03281c), 2022-01-01
Supplement: d2nj03281c1.pdf [file d2nj03281c1.pdf]

## Content

- Table S1** Crystal data and structure refinement parameters of **1**.
- Table S2** Selected bond lengths (Å) and angles (°) for **1**.
- Table S3** Standard deviation and detection limit calculation for  $\text{Fe}^{3+}$ ,  $\text{Cr}_2\text{O}_7^{2-}$ ,  $\text{CrO}_4^{2-}$  and NFT.
- Table S4** HOMO and LUMO energy levels of selected antibiotics and  $\text{H}_2\text{DCB}$  calculated by density functional theory (DFT) at B<sub>3</sub>LYP/6-31G\*\* level.
- Scheme S1** Schematic drawing of the ligands  $\text{H}_2\text{DCB}$ .
- Figure S1** The binuclear  $[\text{Co}_2(\text{biimidazole})_2]$  unit in **1**.
- Figure S2** The 3D framework with 1D channels in **1**.
- Figure S3** The PXRD patterns for **1** under different conditions.
- Figure S4** The TG curve of **1**.
- Figure S5** The solid state fluorescent excitation and emission spectra for **1** and  $\text{H}_2\text{DCB}$ .
- Figure S6** Experimental and fitting lifetime curves of the suspension of **1** (a) before and after addition of  $\text{Fe}^{3+}$ (b),  $\text{Cr}_2\text{O}_7^{2-}$ (c),  $\text{CrO}_4^{2-}$ (d) and NFT(e) ( $\lambda_{\text{ex}} = 245 \text{ nm}$ ).
- Figure S7** UV-vis spectra of different metal cations and the emission spectra of **1** (red) in  $\text{H}_2\text{O}$  solution.
- Figure S8** UV-vis spectra of different anions and the emission spectra of **1** (red) in  $\text{H}_2\text{O}$  solution.
- Figure S9** (a) UV-vis spectra of different antibiotics and the emission spectra of **1** (red) in  $\text{H}_2\text{O}$  solution; (b) The HOMO and LUMO energy levels for different antibiotics and  $\text{H}_2\text{DCB}$  ligand.
- Figure S10** Cycling runs of **1** for the degradation of MB(a) and RhB(b).
- Figure S11** Trapping experiment of active species during the photocatalytic reaction with **1**.

**Table S1** Crystal data and structure refinement parameters of **1**.

| <b>1</b>                                            |                                                                  |
|-----------------------------------------------------|------------------------------------------------------------------|
| Formula                                             | C <sub>22</sub> H <sub>20</sub> N <sub>4</sub> O <sub>6</sub> Co |
| Formula weight                                      | 495.35                                                           |
| Crystal system                                      | monoclinic                                                       |
| Space group                                         | C2/c                                                             |
| <i>a</i> (Å)                                        | 11.280(2)                                                        |
| <i>b</i> (Å)                                        | 18.471(3)                                                        |
| <i>c</i> (Å)                                        | 20.171(4)                                                        |
| $\alpha$ (°)                                        | 90                                                               |
| $\beta$ (°)                                         | 100.516(2)                                                       |
| $\gamma$ (°)                                        | 90                                                               |
| Volume (Å <sup>3</sup> )                            | 4132.1(13)                                                       |
| <i>Z</i>                                            | 8                                                                |
| <i>T</i> (K)                                        | 296(2)                                                           |
| <i>D</i> <sub>calcd</sub> (mg·m <sup>-3</sup> )     | 1.592                                                            |
| $\mu$ (mm <sup>-1</sup> )                           | 0.881                                                            |
| <i>R</i> <sub>int</sub>                             | 0.0245                                                           |
| <i>F</i> (000)                                      | 2040                                                             |
| $\theta$ range (°)                                  | 2.054 ≤ $\theta$ ≤ 26.000                                        |
| Reflns. collected                                   | 21344                                                            |
| Data / restraints / parameters                      | 4067/0/293                                                       |
| Goodness of fit on <i>F</i> <sup>2</sup>            | 0.927                                                            |
| Final <i>R</i> indices [ <i>I</i> > 2σ( <i>I</i> )] | <i>R</i> <sub>1</sub> =0.0297, <i>wR</i> <sub>2</sub> =0.0855    |
| <i>R</i> indices (all data)                         | <i>R</i> <sub>1</sub> =0.0346, <i>wR</i> <sub>2</sub> =0.0883    |
| Largest diff. peak and hole (e Å <sup>-3</sup> )    | 0.53 and -0.67                                                   |

$$R_1 = \frac{\sum |F_o| - |F_c|}{\sum |F_o|}, \quad \omega R_2 = \frac{\sum [w(F_o^2 - F_c^2)^2]}{\sum [w(F_o^2)]^{1/2}}$$

**Table S2** Selected bond lengths (Å) and angles (°) for **1**.

| <b>1</b>          |            |                   |            |
|-------------------|------------|-------------------|------------|
| Co(1)-N(1)        | 2.0751(15) | Co(1)-N(2C)       | 2.0596(16) |
| Co(1)-O(1B)       | 2.0366(14) | Co(1)-O(2B)       | 2.2958(15) |
| Co(1)-O(3A)       | 2.0161(15) | Co(1)-O(4A)       | 2.6001(15) |
| N(1)-Co(1)-O(2B)  | 91.31(6)   | O(3A)-Co(1)-O(2B) | 90.05(6)   |
| N(1)-Co(1)-N(2C)  | 97.23(6)   | O(1B)-Co(1)-O(2B) | 60.24(5)   |
| N(1)-Co(1)-O(3A)  | 99.88(6)   | O(1B)-Co(1)-N(2C) | 102.45(6)  |
| O(3A)-Co(1)-N(2C) | 103.21(7)  | N(1)-Co(1)-O(2B)  | 114.38(6)  |
| N(2C)-Co(1)-O(2B) | 162.68(5)  | O(3A)-Co(1)-O(1B) | 133.61(6)  |

Symmetry codes: A:  $-1/2+x, 1/2-y, -1/2+z$ ; B:  $-1+x, y, z$ ; C:  $1-x, -y, 1-z$ .

**Table S3** Standard deviation and detection limit calculation for Fe<sup>3+</sup>, Cr<sub>2</sub>O<sub>7</sub><sup>2-</sup>, CrO<sub>4</sub><sup>2-</sup> and NFT.

|                        | Fe <sup>3+</sup>      | Cr <sub>2</sub> O <sub>7</sub> <sup>2-</sup> | CrO <sub>4</sub> <sup>2-</sup> | NFT                   |
|------------------------|-----------------------|----------------------------------------------|--------------------------------|-----------------------|
| 1                      | 776.745189            | 794.583227                                   | 797.843189                     | 793.831114            |
| 2                      | 776.945375            | 794.633116                                   | 797.943267                     | 793.974444            |
| 3                      | 777.035281            | 794.493031                                   | 797.764316                     | 793.716773            |
| 4                      | 776.645356            | 794.715633                                   | 797.953343                     | 793.962235            |
| 5                      | 776.865284            | 794.423116                                   | 797.653377                     | 793.753454            |
| Standard deviation (σ) | 0.13892               | 0.10283                                      | 0.11289                        | 0.10534               |
| Slope (m)              | 1.03×10 <sup>4</sup>  | 1.41×10 <sup>4</sup>                         | 1.65×10 <sup>4</sup>           | 3.11×10 <sup>4</sup>  |
| Detection limit (3σ/m) | 4.04×10 <sup>-5</sup> | 2.18×10 <sup>-5</sup>                        | 2.05×10 <sup>-5</sup>          | 1.02×10 <sup>-5</sup> |

**Table S4** HOMO and LUMO energy levels of selected antibiotics and H<sub>2</sub>DCB calculated by density functional theory (DFT) at B<sub>3</sub>LYP/6-31G\*\* level.

|                    | HOMO (eV) | LUMO (eV) | Band Gap (eV) |
|--------------------|-----------|-----------|---------------|
| NFT                | -6.70     | -3.12     | 3.58          |
| CAP                | -7.24     | -2.52     | 4.72          |
| DTZ                | -6.93     | -2.32     | 4.61          |
| SDZ                | -6.20     | -1.02     | 5.18          |
| PCL                | -6.49     | -0.50     | 5.99          |
| H <sub>2</sub> DCB | -5.82     | -1.48     | 4.19          |

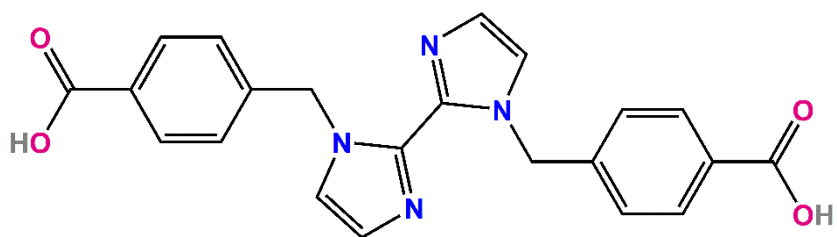

**Scheme S1** Schematic drawing of the ligands H<sub>2</sub>DCB.

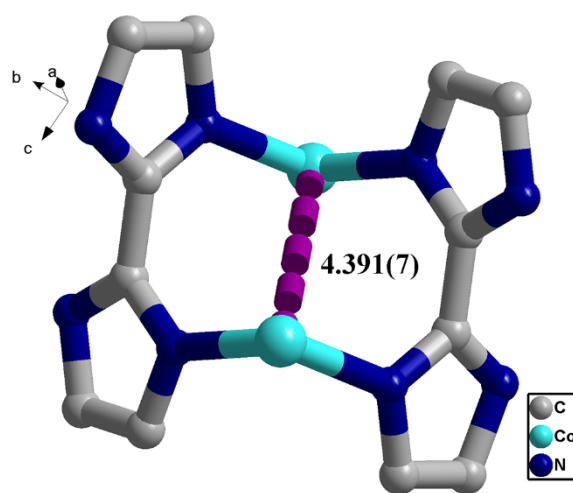

**Figure S1** The binuclear [Co<sub>2</sub>(biimidazole)<sub>2</sub>] unit in **1**.

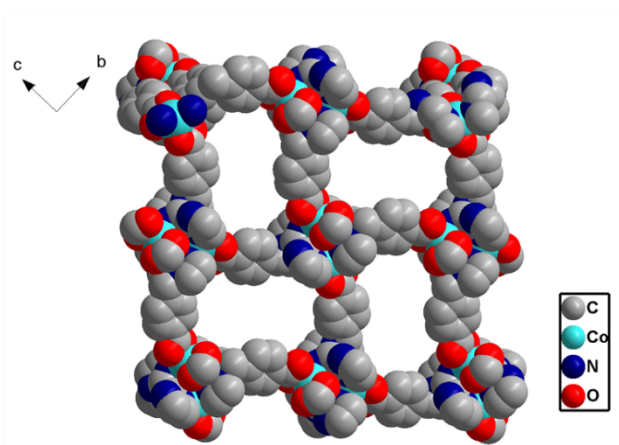

**Figure S2** The 3D framework with 1D channels in **1**.

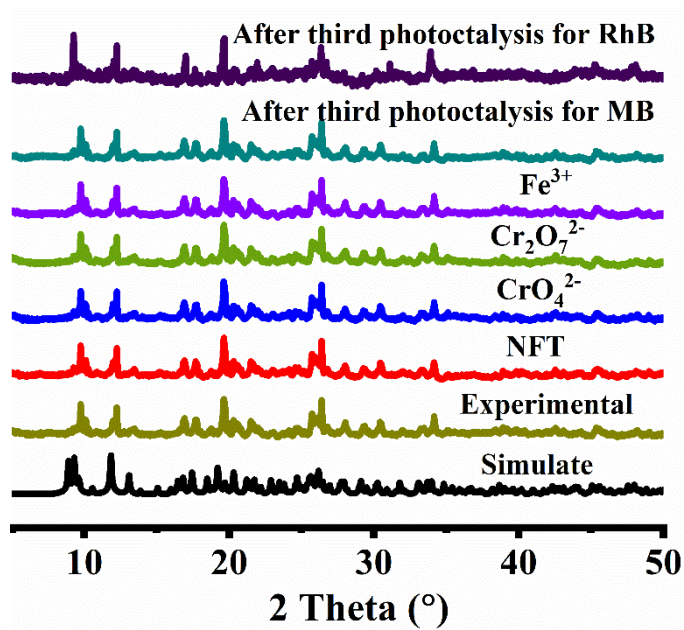

Figure S3 The PXRD patterns for **1** under different conditions.

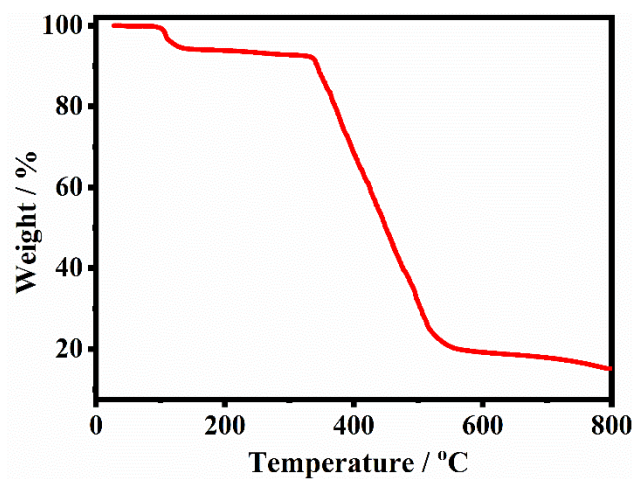

Figure S4 The TG curve of **1**.

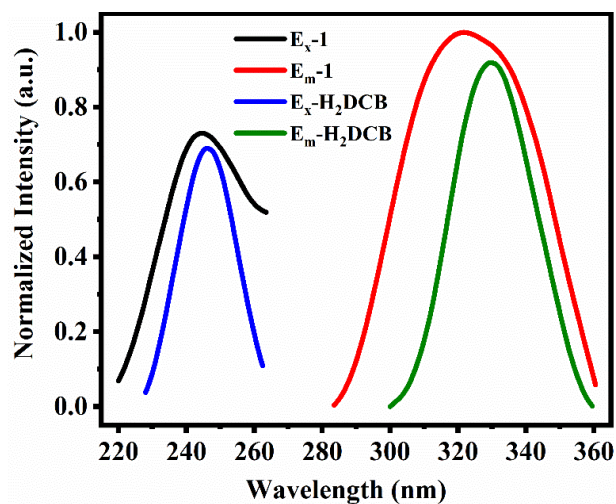

**Figure S5** The solid state fluorescent excitation and emission spectra for **1** and H<sub>2</sub>DCB.

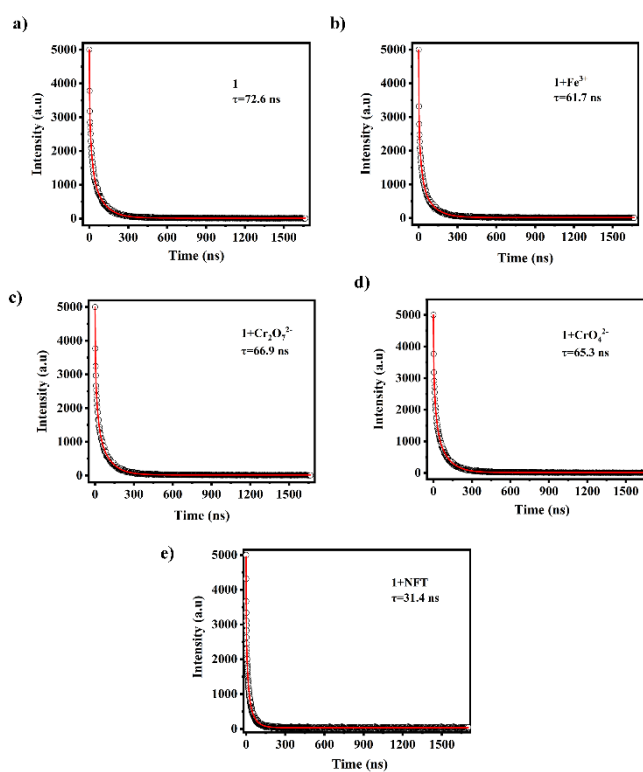

**Figure S6** Experimental and fitting lifetime curves of the suspension of **1** (a) before and after addition of Fe<sup>3+</sup>(b), Cr<sub>2</sub>O<sub>7</sub><sup>2-</sup>(c), CrO<sub>4</sub><sup>2-</sup>(d) and NFT(e) ( $\lambda_{ex} = 245$  nm).

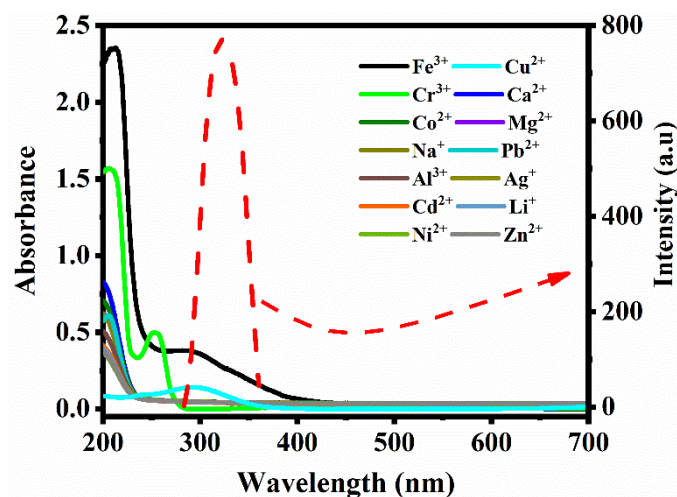

**Figure S7** UV-vis spectra of different metal cations and the emission spectra of **1** (red) in H<sub>2</sub>O solution.

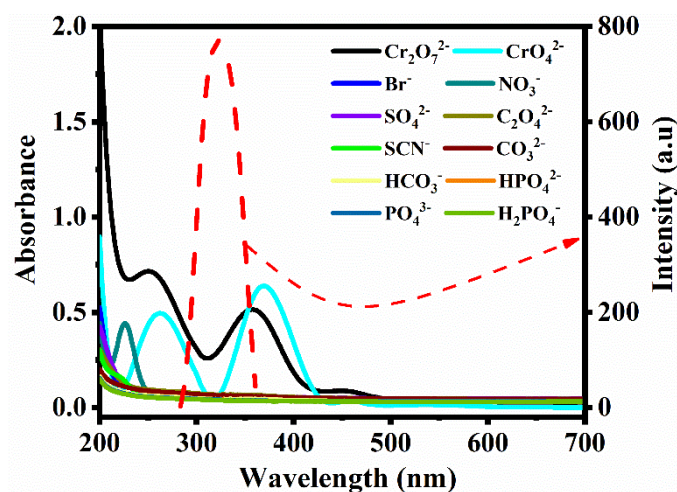

**Figure S8** UV-vis spectra of different anions and the emission spectra of **1** (red) in H<sub>2</sub>O solution.

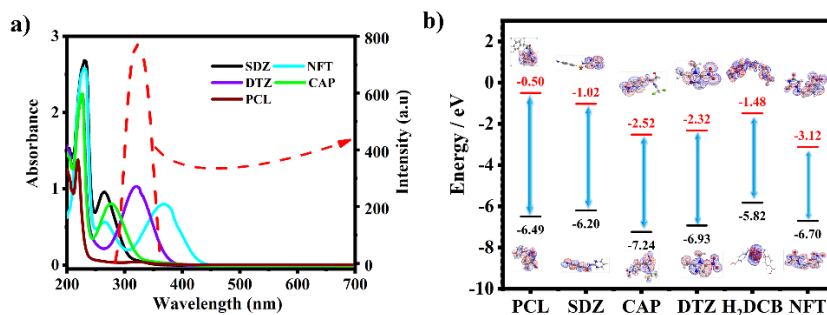

**Figure S9** (a) UV-vis spectra of different antibiotics and the emission spectra of **1** (red) in H<sub>2</sub>O solution; (b) The HOMO and LUMO energy levels for different antibiotics and H<sub>2</sub>DCB ligand.



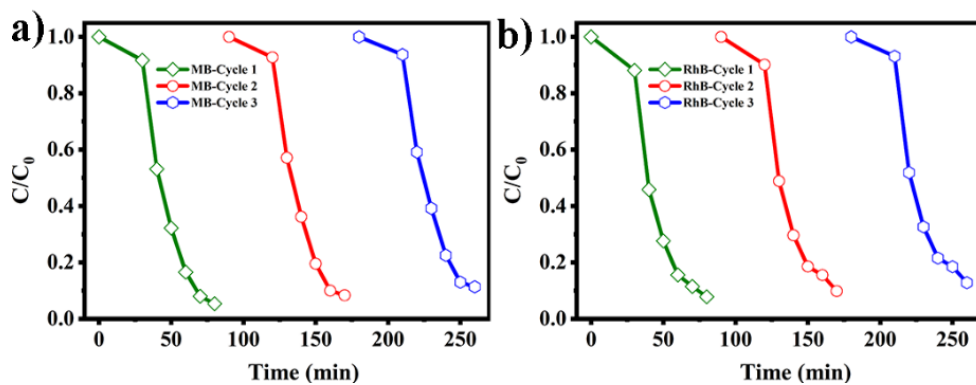

Figure S10 Cycling runs of 1 for the degradation of MB(a) and RhB(b).

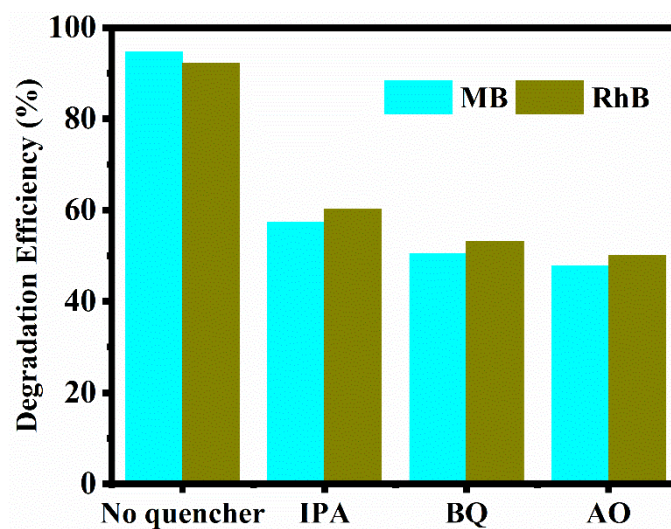

Figure S11 Trapping experiment of active species during the photocatalytic reaction with 1.
